# Supplementary material for: Plasma Lithium Levels in the General Population: A Cross-Sectional Analysis of Metabolic and Dietary Correlates
Source: PubMed Central journal article supplement (PMC7468710; doi:10.3390/nu12082489), 2020-08-18
Supplement: nutrients-12-02489-s001.pdf [file nutrients-12-02489-s001.pdf]

## Plasma Lithium Levels in a General Population: a Cross-Sectional Analysis of Metabolic and Dietary Correlates

by Enderle et al.

**Table S1.** Circulating plasma lithium concentration according to season (n=928)

|                                                                     | Spring            | Sommer            | Autumn            | Winter            | p-value |
|---------------------------------------------------------------------|-------------------|-------------------|-------------------|-------------------|---------|
| <b>Plasma concentration of lithium [<math>\mu\text{g/L}</math>]</b> | 0.90 (0.67; 1.23) | 0.98 (0.73; 1.39) | 1.01 (0.74; 1.37) | 0.98 (0.69; 1.41) | 0.18    |

values are median (Q1; Q2) and p-value is based on Kruskal Wallis test; Abbreviation: Q, quartile
